# 1 **Molecular insights into differentiated ligand recognition of the human parathyroid** 2 **hormone receptor 2**

3 Xi Wang<sup>1,2,10</sup>, Xi Cheng<sup>3,9,10</sup>, Lihua Zhao<sup>2,4,10</sup>, Yuzhe Wang<sup>1,2</sup>, Chenyu Ye<sup>5</sup>, Xinyu Zou<sup>6</sup>, Antao Dai<sup>1</sup>,  
4 Zhaotong Cong<sup>5</sup>, Jian Chen<sup>5</sup>, Qingtong Zhou<sup>7</sup>, Tian Xia<sup>6</sup>, Hualiang Jiang<sup>2,3,9</sup>, Eric H. Xu<sup>2,4,\*</sup>, Dehua  
5 Yang<sup>1,2,4,\*</sup>, Ming-Wei Wang<sup>1,2,4,5,7,8,\*</sup>

6 <sup>1</sup>The National Center for Drug Screening, Shanghai Institute of Materia Medica, Chinese Academy of  
7 Sciences, Shanghai 201203, China.

8 <sup>2</sup>University of Chinese Academy of Sciences, Beijing 100049, China.

9 <sup>3</sup>State Key Laboratory of Drug Research and Drug Discovery and Design Center, Shanghai Institute of  
10 Materia Medica, Chinese Academy of Sciences, 201203, Shanghai, China.

11 <sup>4</sup>The CAS Key Laboratory of Receptor Research, Shanghai Institute of Materia Medica, Chinese  
12 Academy of Sciences, Shanghai 201203, China.

13 <sup>5</sup>School of Pharmacy, Fudan University, Shanghai 201203, China.

14 <sup>6</sup>School of Artificial Intelligence and Automation, Huazhong University of Science and Technology,  
15 Wuhan 430074, China.

16 <sup>7</sup>School of Basic Medical Sciences, Fudan University, Shanghai 200032, China.

17 <sup>8</sup>School of Life Science and Technology, ShanghaiTech University, Shanghai 201210, China.

18 <sup>9</sup>School of Pharmaceutical Science and Technology, Hangzhou Institute of Advanced Study,  
19 Hangzhou 310024, China.

20 <sup>10</sup>These authors contributed equally.

21 \*Corresponding author. Email: eric.xu@simm.ac.cn (H.E.X.); dhyang@simm.ac.cn (D.H.Y.);  
22 mwwang@simm.ac.cn (M.-W.W).

23

## 24 **Abstract**

25 The parathyroid hormone receptor 2 (PTH2R) is a class B1 G protein-coupled receptor (GPCR)  
26 involved in regulation of calcium transport, nociception mediation, and wound healing. Naturally  
27 occurring mutations in PTH2R were reported to cause hereditary diseases, including syndromic short  
28 stature. Here we report the cryo-electron microscopy structure of PTH2R bound to its endogenous  
29 ligand, tuberoinfundibular peptide (TIP39), and a heterotrimeric G<sub>s</sub> protein at a global resolution of 2.8  
30 Å. The structure reveals that TIP39 adopts a unique loop conformation at N terminus and deeply  
31 inserts into the orthosteric ligand-binding pocket in the transmembrane (TM) domain. Molecular  
32 dynamics (MD) simulation and site-directed mutagenesis studies uncover the basis of ligand  
33 specificity relative to three PTH2R agonists, TIP39, PTH, and PTH-related peptide (PTHrP). We also  
34 compare the action of TIP39 with an antagonist lacking six residues from the peptide N terminus,  
35 TIP(7-39), which underscores the indispensable role of the N terminus of TIP39 in PTH2R activation.  
36 Additionally, we unveil that a disease-associated mutation G258D significantly diminished cAMP  
37 accumulation induced by TIP39. Together, these results not only provide structural insights into ligand  
38 specificity and receptor activation of class B1 GPCRs, but also offer a foundation to systematically  
39 rationalize the available pharmacological data to develop novel therapies for various disorders  
40 associated with PTH2R.

41

## 42 **Introduction**

43 Class B1 G protein-coupled receptors (GPCRs) comprise 15 members involved in a wide  
44 spectrum of physiological functions (1, 2). A number of them are validated drug targets for different  
45 human diseases, such as osteoporosis, type 2 diabetes, obesity, psychiatric disorders, and migraine.  
46 Among them are two types of parathyroid hormone (PTH) receptors (PTH1R and PTH2R), whose  
47 action are mediated by coupling primarily to the stimulatory G protein (G<sub>s</sub>) (3, 4). Expressed in the  
48 central and peripheral nervous systems, PTH2R is a key mediator of nociception, wound healing and

49 maternal behavior (5-8). In addition, recent studies have shown that it regulates calcium transport and  
50 influences keratinocyte differentiation, pointing to its potential in the treatment of Darier disease or  
51 Hailey-Hailey disease (9). In addition, naturally occurring PTH2R mutations have been linked to  
52 familial early-onset generalized osteoarthritis, syndromic intellectual disability and syndromic short  
53 stature (10, 11). The latter is presently being treated with recombinant human growth hormone (12).

54 PTH receptors have three endogenous ligands, namely, tuberoinfundibular peptide of 39 residues  
55 (TIP39), PTH and parathyroid hormone-related peptide (PTHrP). Unlike PTH and PTHrP that mainly  
56 expressed in peripheral systems, TIP39-containing neuronal cell bodies have been identified in the  
57 subparafascicular area and the medial paralemniscal nucleus (13). Both PTH and PTHrP are implicated  
58 in skeletal development, calcium homeostasis and bone turnover (14). In fact, PTH(1-34) and  
59 abaloparatide, a variant of PTHrP(1-34) (15), are FDA approved drugs for osteoporosis. Discovered in  
60 the bovine hypothalamus, TIP39 contains two identical and several similar residues common to PTH  
61 and PTHrP. However, there is no evidence to suggest that TIP39 plays a role in mineral or bone  
62 metabolism. In contrast to PTH that indistinguishably activates both receptors, TIP39 is selective for  
63 PTH2R (13, 16), while PTHrP only has a weak action on PTH2R (3, 4, 13). Deletion of six residues  
64 from the N terminus of TIP39 results in a PTH2R antagonist, TIP(7-39) (17). However, the underlying  
65 mechanism by which PTH2R selectively recognizes these related but distinct peptides is largely  
66 unknown. Although newly solved cryo-electron microscopy (cryo-EM) structure of LA-PTH-PTH1R-  
67 G<sub>s</sub> complex offers valuable insights into PTH recognition and receptor activation (18), questions  
68 remain relative to their applicability to PTH2R. Thus, we determined the single-particle cryo-EM  
69 structure of the human PTH2R in complex with TIP39 and a heterotrimeric G<sub>s</sub> protein at a global  
70 resolution of 2.8 Å. Together with molecular dynamics (MD) simulation results, it provides an in-  
71 depth understanding of the structural basis of ligand specificity and PTH2R activation.

72

## 73 Results

### 74 Overall structure

75 As shown in Fig. 1 and Figs. S1-S2, the final model of the PTH2R-G<sub>s</sub> complex contains the first 34  
76 amino acids of TIP39, the PTH2R (residues from Thr31<sup>ECD</sup>- Ser434<sup>8,64b</sup>) (class B1 GPCR numbering  
77 in superscript) (19), a dominant-negative human G<sub>αs</sub> including eight mutations (S54N, G226A,  
78 E268A, N271K, K274D, R280K, T284D and I285T), except for the α-helical domain (AHD), rat Gβ1,  
79 bovine Gγ2 and nanobody Nb35. Excluding the extracellular domain (ECD), the side chains of a  
80 majority of residues were well defined in the EM density maps (Fig. 1A, Fig. S3 and Table S1). The  
81 overall structure of this complex is similar to that of other activated class B1 GPCRs such as LA-PTH-  
82 PTH1R-G<sub>s</sub> (18), GLP-1-GLP-1R-G<sub>s</sub> (20) and glucagon-GCGR-G<sub>s</sub> (21) with C $\alpha$  root mean square  
83 deviation (RMSD) values of 0.98 Å, 0.72 Å, and 0.94 Å for the whole complex, respectively.

84 A notable structural difference occurs in the TMD ligand-binding pocket of these receptors. Fig.  
85 1C and Fig. S4 illustrate the shapes and the sizes of the TMD pockets and their cognate ligands. The  
86 interfacing structure of TIP39-PTH2R buried areas is 2,068 Å<sup>2</sup>, 65% of which was contributed by the  
87 N-terminal half of TIP39. Different from a typical peptide in the class B1 GPCR subfamily that adopts  
88 an extended helix with its N-terminus inserted deeply into the TMD, TIP39 exhibits a single  
89 amphipathic α-helix from Leu4<sup>P</sup> (P indicates that the residue belongs to peptide) to Leu34<sup>P</sup>, with Leu4<sup>P</sup>  
90 being the deepest residue within the receptor core, and adopts a closed loop at the peptide N-terminus  
91 (the first three residues) surrounded by TM5, TM6, ECL2 and ECL3 (Fig. 2A). In addition, unlike  
92 other class B1 GPCRs, PTH2R has an extended TM1 helix capable of interacting with a peptidic  
93 ligand. Diverse ECD positions in PTH2R and other class B1 GPCRs also presumably adjust individual  
94 peptide helix to respective TMD pocket in a manner that is specific for each receptor (Fig. 1C, Fig.  
95 S4). In contrast to the ECL1 of growth hormone releasing hormone receptor (GHRHR) that stretches  
96 around GHRH to form broad interactions, no structural features in the ECL1 region of PTH2R were

97 observed. This subtle difference supports our previous hypothesis that different activation requirement  
98 exists in class B1 GPCRs (22).

99 With respect to the PTH2R-G<sub>s</sub> interface, the outward movement of TM6 leads to a large opening  
100 of the cytoplasmic cavity for G<sub>s</sub> coupling. The overall assembly of receptor-G<sub>s</sub> complexes is very  
101 similar among class B1 GPCR structures solved to date (18, 23-25). In this study, the PTH2R-G<sub>s</sub>  
102 complex is anchored with the  $\alpha 5$ -helix of G $\alpha_s$ , which fits snugly into the cytoplasmic cavity of the  
103 TMD. Additional contacts are observed between the extended helix 8 and the G $\beta$  subunit (Fig. S5). A  
104 number of detailed side chain interactions are visible in the receptor-G<sub>s</sub> interface (Fig. S5). The side  
105 chain of Glu392 and the last helical residue of the  $\alpha 5$  helix in G $\alpha_s$  form a capping interaction with  
106 backbone amine of helix 8. Arg385 and Asp381 at the middle of the  $\alpha 5$  helix in G $\alpha_s$  make charged  
107 interactions with Glu346<sup>ICL3</sup> and Lys343<sup>5,64b</sup> of TM5, respectively. The carboxylate group at the C-  
108 terminal end of the  $\alpha 5$  helix in G $\alpha_s$  forms a salt bridge with Lys360<sup>6,37b</sup> of TM6. Besides these polar  
109 and charged interactions, hydrophobic residues Leu388, Tyr391, Leu393 and Leu394 pack tightly  
110 against the hydrophobic surface comprised of residues of TM2, TM3, TM5, TM6 and TM7.  
111 Additionally, like other class B1 GPCRs, the  $\alpha 5$  helix of G $\alpha_s$  also interacts with ICL2 and helix 8 of  
112 PTH2R (Fig. S5).

### 113 **Ligand specificity**

114 An extensive network of complementary polar and non-polar contacts between TIP39 and PTH2R was  
115 observed (Fig. 2 and Table S2). Pointing to the receptor core, Ser1<sup>P</sup> forms one hydrogen bond with  
116 ECL2 (Ser310<sup>ECL2</sup>) via its side chain, and has its amine terminus interact with the  $\alpha$ -helix part (Asp7<sup>P</sup>)  
117 of TIP39. Asp6, a highly conserved residue in glucagon-like peptides (26), makes one hydrogen bond  
118 and a salt bridge with Tyr152<sup>1,47b</sup> and Arg190<sup>2,60b</sup>, respectively, in line with abolished or decreased  
119 potencies for TIP39 observed in mutants Y152A and R190A (by 794-fold) (Fig. 2C, Tables S3 and  
120 S4). Meanwhile, Glu21<sup>P</sup> forms a salt bridge with Arg305<sup>ECL2</sup>, consistent with a 16-fold reduction of

121 TIP39 potency in mutant R305A (Fig. 2C, Tables S3 and S4). Non-polar interactions between TIP39  
122 and PTH2R TMD are mainly contributed by the extracellular portions of TMs 1, 2 and 7, involving  
123 Phe141<sup>1.36b</sup>, Lys197<sup>2.67b</sup>, Phe243<sup>3.36b</sup>, Met395<sup>7.39b</sup> and Leu399<sup>7.43b</sup>. Removal of the non-polar contacts  
124 by alanine substitutions lowered the peptide potency by 12 ~ 80-fold (Fig. 2C and Tables S2-S4). Of  
125 interest, the TM1 of PTH2R bends down towards TIP39, resulting in polar interactions between  
126 Arg23<sup>P</sup> and Gln130<sup>1.25b</sup>, and shifting the peptide C-terminal region towards ECL1, while the ECD  
127 clasps this region (residues 22 to 39) with massive hydrophobic contacts and several polar interactions  
128 (Fig. 2B and Table S2).

129 Structural comparison of TIP39–PTH2R–G<sub>s</sub> and LA-PTH–PTH1R–G<sub>s</sub> complexes reveals distinct  
130 features of the ligand recognition pattern between PTH1R and PTH2R. To specifically accommodate  
131 TIP39, PTH2R reforms its peptide-binding pocket by reorganizing the conformations of ECL3 and the  
132 extracellular parts of TM1 and TM7, as well as adopts receptor-specific amino acids at multiple  
133 positions that directly interact with the peptide. ECL3 is unstructured in PTH2R but is well solved in  
134 PTH1R that forms several additional direct contacts with the N-terminal portion of the bound LA-PTH  
135 (Figs. 2A and 3A). Such differences might contribute to the greater mobility of ECL3 in PTH2R that  
136 moves outward in response to the unique loop conformation at the N terminus of TIP39. Consequently,  
137 the extracellular tip of TM7 in PTH2R also shifts outward by 2 Å (measured at the C $\alpha$  of Trp<sup>7.35b</sup>)  
138 thereby decreasing the contacts with the bound TIP39. Meanwhile, the extracellular tip of TM1 in  
139 PTH2R is extended by six residues, allowing the formation of a hydrogen bond between Gln130<sup>1.25b</sup>  
140 and Arg23<sup>P</sup>, which is not observed in the LA-PTH–PTH1R–G<sub>s</sub> complex (18).

141 Besides the distinct conformations of TMs and ECLs, PTH1R and PTH2R use different amino  
142 acids (including Tyr318<sup>5.39b</sup>, Lys197<sup>2.67b</sup>, Arg305<sup>ECL2</sup> in PTH2R) to recognize their peptides (Fig. 3B).  
143 PTH2R uses a polar residue Tyr318<sup>5.39b</sup> to form hydrogen bonds with Asp7<sup>P</sup> and Arg11<sup>P</sup> of TIP39,  
144 while PTH1R has a hydrophobic isoleucine (Ile363<sup>5.39b</sup>) at the corresponding site (Fig. 3B).  
145 Interestingly, Asp7<sup>P</sup> is one unique site of TIP39 that corresponding to Ile5<sup>P</sup> of PTH and His5<sup>P</sup> of

146 PTHrP (Fig. 3B). In our MD simulations of PTH2R engaging different peptides, Asp7<sup>P</sup> of TIP39  
147 stably formed hydrogen bonds with Tyr318<sup>5.39b</sup>, while Ile5<sup>P</sup> of PTH made hydrophobic interactions  
148 with Tyr318<sup>5.39b</sup> (Fig. 3C, Fig. S6). In contrast, no hydrogen bond or hydrophobic interaction between  
149 His5<sup>P</sup> of PTHrP and Tyr318<sup>5.39b</sup> were observed in the PTHrP-bound PTH2R simulations. This  
150 observation is consistent with our mutagenesis studies, where Y318A mutation of PTH2R decreased  
151 TIP39 potency by 794-fold but increased PTH potency by 4-fold (Fig. S7). Lys197<sup>2.67b</sup> of PTH2R has  
152 stable hydrophobic interactions with the aromatic Phe10<sup>P</sup> of TIP39, which is stronger than the  
153 interactions with the smaller hydrophobic side chains of corresponding residues at PTH (Met8<sup>P</sup>) or  
154 PTHrP (Leu8<sup>P</sup>) (Fig. 3C). TIP39 and PTH share a conserved negatively charged residue (TIP39  
155 Glu21<sup>P</sup> or PTH Glu19<sup>P</sup>), but PTHrP has a positively charged arginine (Arg19<sup>P</sup>) instead. In the  
156 simulations, either Glu21<sup>P</sup> (TIP39) or Glu19<sup>P</sup> (PTH) formed putative salt bridges with a positively  
157 charged ECL2 residue Arg305<sup>ECL2</sup> (Fig. 3C), while PTHrP Arg19<sup>P</sup> repelled Arg305<sup>ECL2</sup> and might  
158 impede the peptide binding. In addition to the residues crucial to ligand specificity, there are several  
159 conserved contacts shared by PTH1R and PTH2R. Either Glu4<sup>P</sup> of LA-PTH or Asp6<sup>P</sup> of TIP39  
160 contributes salt bridges with Arg<sup>2.60b</sup> and hydrogen bonds with Tyr<sup>1.47b</sup>. At the middle region of these  
161 three peptides, two residues (Ala5<sup>P</sup>/Ala9<sup>P</sup> in TIP39, Ser3<sup>P</sup>/Leu7<sup>P</sup> in both PTH and PTHrP)  
162 hydrophobically interacted with Leu399<sup>7.43b</sup> in all simulations (Fig. S6B-D). At the C termini of  
163 peptides, a hydrophobic residue (Trp25<sup>P</sup> in TIP39, Trp23<sup>P</sup> in PTH and Phe23<sup>P</sup> in PTHrP) with a large  
164 side chain constantly interacts with two ECD residues Ile34<sup>ECD</sup> and Ile38<sup>ECD</sup> (Fig. S6H-J). I34A and  
165 I38A mutants significantly reduced the potencies of TIP39 and PTH (Fig. S7 and Table S5), which is  
166 fully consistent with the simulation results.

### 167 **Antagonism by TIP(7-39)**

168 Deletion of six residues from the N terminus of TIP39 resulted in an antagonist, TIP(7-39) (Fig. 4A)  
169 (17). In the MD simulations of TIP(7-39)-bound PTH2R, the receptor spontaneously transitioned from  
170 the active conformation to an inactive-like one, displaying a smaller TM6 helix kinking angle ( $76.9^\circ \pm$

171 9.1°) compared with that of TIP39 bound PTH2R ( $88.2^\circ \pm 8.3^\circ$ ) (Fig. 4B-C). In the TIP39-bound  
172 PTH2R simulations, the N terminus of the peptide resided between TM5 and TM6 helices (Fig. 4B,  
173 D). Particularly, the residues located at the N terminus of TIP39 interacted with TM5 residues  
174 (Tyr318<sup>5.39b</sup>, Gln319<sup>5.40b</sup>, Ile322<sup>5.43b</sup>, Leu323<sup>5.44b</sup> and Ile326<sup>5.47b</sup>), close to the ligand-binding pocket  
175 (Fig. 4D, F). Single-point mutations of these residues such as Y318A and Q319A showed significantly  
176 reduced cAMP accumulations induced by TIP39 (Fig. 2C), which is consistent with the MD  
177 observations. In the TIP(7-39)-bound PTH2R simulations, the interactions between the N terminus of  
178 the peptide and TM5 helix were missing (Fig. 4E, F). Consequently, the average backbone distance  
179 between TIP(7-39) and TM5 helix was  $12.9 \pm 0.6$  Å, approximately 6 Å longer than that of TIP39-  
180 bound PTH2R ( $7.2 \pm 0.7$  Å). TIP(7-39) did not have stable interactions with TM6 helix (Fig. 4F).  
181 Without direct contacts with the peptide, the C terminus of TM6 helix moved upwards to reduce the  
182 kinking (Fig. 4C, E). In the TIP39-bound PTH2R simulations, stable insertion of the N terminus led to  
183 a large movement of  $9.8 \pm 0.8$  Å between TM5 and TM6 helices on the extracellular side, which kept  
184 the large kinking angle of the TM6 helix (Fig. 4D). In addition, a conserved TM7 residue Gln405<sup>7.49b</sup>  
185 could form hydrogen bonds with the backbone atoms of the TM6 residue Leu370<sup>6.47b</sup> to further  
186 stabilize the kinking conformation of the TM6 helix during the simulations (Fig. 4D, Fig. S8). In the  
187 TIP(7-39)-bound PTH2R simulations, however, the polar interactions between TM6 Leu370<sup>6.47b</sup> and  
188 TM7 Gln405<sup>7.49b</sup> were missing in the receptor core (Fig. 4E, Fig. S8).

189 At the bottom of the ligand-binding pocket, the aspartic acid residue Asp6<sup>P</sup> of TIP39 was  
190 mainly responsible for interacting with Tyr152<sup>1.47b</sup> and Arg190<sup>2.60b</sup> (Fig. S8); two residues that govern  
191 the functionality of PTH2R (Fig. 2). Multiple hydrogen bonds were formed between these residues.  
192 The average atom distances from the Asp6<sup>P</sup> in TIP39 to Tyr152<sup>1.47b</sup> and Arg190<sup>2.60b</sup> were  $2.8 \pm 0.3$  Å  
193 and  $2.8 \pm 0.2$  Å, respectively. Because TIP(7-39) does not have Asp6<sup>P</sup>, its Asp7<sup>P</sup> flipped into the  
194 receptor core to interact with Tyr152<sup>1.47b</sup> and Arg190<sup>2.60b</sup> instead of Asp6<sup>P</sup> seen with TIP39 (Fig. S8).  
195 Through the C terminus, both of TIP39 and TIP(7-39) are capable of stably interacting with the ECD.



196 Ligand binding patterns at the ECD were almost identical in TIP39 bound and TIP(7-39) bound  
197 PTH2R simulations (Fig. S8C). These findings demonstrate that the C terminus of TIP39 and TIP(7-  
198 39) contribute to ligand binding, while the N terminus determine receptor activation.

### 199 **Disease-associated mutation**

200 Several naturally occurring mutations in PTH2R have been reported to cause multiple hereditary  
201 human disorders (10, 11). Of them, two mutations (S158F and G258D) occur in regions that were  
202 well-solved in our PTH2R structure, but only G258D significantly affected TIP39 elicited cAMP  
203 accumulation (Fig. S9 and Table S6). Gly258<sup>3.51b</sup> is located at the intracellular side of TM3 helix (a  
204 part of the G-protein-binding interface) and implicated in syndromic short stature (10). In the wild-  
205 type (WT) PTH2R MD simulations, Gly258<sup>3.51b</sup> was surrounded by several hydrophobic residues  
206 (Leu259<sup>3.52b</sup>, Leu332<sup>5.53b</sup> and Phe372<sup>6.49b</sup>) of helices TM3, TM5 and TM6 (Fig. 5A, B). Particularly,  
207 Gly258<sup>3.51b</sup> and Phe372<sup>6.49b</sup> are constantly interacting with an average distance of  $3.3 \pm 0.2$  Å, forming  
208 the key helix-helix interface between helices TM3 and TM6. The hydrophobic interactions among  
209 Leu259<sup>3.52b</sup>, Leu332<sup>5.53b</sup> and Phe372<sup>6.49b</sup> also stabilized the tight bundle of helices TM3, TM5 and TM6  
210 at the G protein-binding interface. The inter-residue distance between any two of these three residues  
211 was smaller than 4 Å in the WT simulations. However, in the G258D simulations, Asp258<sup>3.51b</sup>  
212 disrupted the hydrophobic interactions involving Leu259<sup>3.52b</sup>, Leu332<sup>5.53b</sup> and Phe372<sup>6.49b</sup> (Fig. 5C, D).  
213 The inter-residue distance between any two of the four residues (Asp258<sup>3.51b</sup>, Leu259<sup>3.52b</sup>, Leu332<sup>5.53b</sup>  
214 and Phe372<sup>6.49b</sup>) was larger than 5 Å in the G258D simulations. As a result, the conformations of  
215 helices TM3, TM5 and TM6 were interrupted at the intracellular side of the receptor. In the WT  
216 simulations, Ile265<sup>3.58b</sup> and Val339<sup>5.60b</sup> formed stable hydrophobic interactions to closely pack TM3  
217 and TM5 helices at the intracellular side. However, in the G258D simulations, no direct interactions  
218 between these two residues were observed, therefore, the intracellular side of TM3, TM5 and TM6  
219 were distorted and unfavorable to bind to a G-protein (Fig. 5E, F).

## 220 Discussion

221 We used the single-particle cryo-EM approach to solve the high-resolution structure of the TIP39-  
222 bound PTH2R in complex with G<sub>s</sub>. It provides essential structural information for understanding how  
223 PTH2R recognizes a peptide ligand and couples to G<sub>s</sub> in the active state. Compared with other class B1  
224 GPCRs (18, 20, 21), PTH2R shows a unique peptide-receptor binding interface, 65% of which is  
225 contributed by the N terminus of TIP39. Unlike typical peptides of class B1 GPCRs that adopt helix  
226 conformations at their N termini, TIP39 displays a closed loop at the N-terminal (Fig. 2A, Fig. S4).  
227 Both cryo-EM and MD simulation data indicate that the unique N terminus of TIP39 not only  
228 facilitates a deep insertion of the peptide into the receptor core (Figs. 2-3 and Fig. S6A), but also  
229 participates in PTH2R activation via interacting with TM5 and TM6. These findings suggest a possible  
230 common mechanism of ligand-induced receptor activation by peptides with loop conformations at the  
231 N-terminal (Fig. S6A).

232 Due to the relatively high-resolution (2.8 Å) of the structure, we were able to address the ligand  
233 specificity of PTH2R against three functionally important peptides (TIP39, PTH and PTHrP). Their  
234 actions could be divided into three modes: potent (TIP39), mild (PTH) and weak (PTHrP), respectively  
235 (4, 13, 16). Integrating MD simulation with mutagenesis studies, we identified key residues  
236 responsible for ligand recognition and characterized important receptor-peptide interactions that  
237 govern ligand specificity. MD simulations showed that three residues in PTH2R (Lys197<sup>2.67b</sup>,  
238 Arg305<sup>ECL2</sup> and Tyr318<sup>5.39b</sup>) are selective against different peptides. Lys197<sup>2.67b</sup> stably interacts with  
239 Phe10<sup>P</sup> of TIP39 (Fig. 3C). Arg305<sup>ECL2</sup> forms putative salt bridges with Glu21<sup>P</sup> of TIP39 or Glu19<sup>P</sup> of  
240 PTH, but repels Arg19<sup>P</sup> of PTHrP (Fig. 3C). Tyr318<sup>5.39b</sup> forms putative hydrogen bonds with Asp7<sup>P</sup> of  
241 TIP39 as well as hydrophobic interactions with Ile5<sup>P</sup> of PTH, but fails to interact with His5<sup>P</sup> of PTHrP  
242 (Fig. 3C). Notably, Gardella and colleagues have reported that the substitution of Ile5<sup>P</sup> of PTH with a  
243 histidine decreases the peptide potency on PTH2R, but the substitution of His5<sup>P</sup> of PTHrP with an

244 Isoleucine significantly increases the potency (27), a phenomenon that is highly consistent with our  
245 MD simulations.

246       Activation of class B1 GPCRs is characterized by opening the transmembrane helix bundles at the  
247 extracellular side, while the intracellular side undergoes conformational changes to accommodate G  
248 protein. Such hourglass-like opening of both extracellular and intracellular portions of the TMD  
249 requires TM6 helix to be bended and tightly tethered to the other helices at the receptor core (18, 20,  
250 21). In this work, we link the opposing activities of an agonist (TIP39) and an antagonist TIP(7-39) the  
251 TM6 helix of PTH2R: both of them bind to the ECD, with TIP39 inserted into the base of the TMD  
252 orthosteric pocket. The N terminus of TIP39 inserts between TM5 and TM6 helices to enhance the  
253 kinking of TM6 helix, a step essential to class B1 GPCR activation. A conserved TM7 residue  
254 (Gln405<sup>7.49b</sup>) forms hydrogen bonds with the backbone atoms of the TM6 (Leu370<sup>6.47b</sup>) might further  
255 stabilize the kinking conformation. A glutamine residue at the corresponding site of other class B1  
256 GPCRs has been reported to act as a molecular switch between receptor activation states (18). Upon  
257 full activation of a receptor, this TM7 glutamine reorients downward to establish hydrogen bonds with  
258 the TM6 helix residues of a conserved LXXG motif (Fig. S10). This conserved rearrangement of the  
259 TM7 residue close to the receptor core enables the stabilization of the distinct kink in TM6 helix to  
260 mediate the simultaneous opening of the intracellular and extracellular side. Compared with TIP39,  
261 TIP(7-39) has the same C terminus but misses six residues at N terminus. MD simulations revealed  
262 that it binds to the ECD via C terminus, but fails to activate the receptor due to lack of stable interaction  
263 with TM6 helix. These findings disclose the structural basis of PTH2R antagonism and underscore an  
264 indispensable role of the N terminus of an agonist in activating PTH2R. This might extend to other  
265 class B GPCRs. In fact, N-terminal truncation of PTH, such as PTH(7-34), also results in antagonists  
266 for PTH1R (28-30).

267 Like some other class B1 GPCRs that are implicated in multiple hereditary human disorders (5–10,  
268 12), PTH2R also has several disease-associated mutations, such as the naturally occurring mutation  
269 G258D that is associated with syndromic short stature (10). By means of MD simulations, we  
270 hypothesize that this mutation might disrupt the active conformation of PTH2R, leading to impaired  
271 receptor function (Fig. S9). Surrounded by several hydrophobic residues (Leu259<sup>3.52b</sup>, Leu332<sup>5.53b</sup> and  
272 Phe372<sup>6.49b</sup>) of helices TM3, TM5 and TM6, Gly258<sup>3.51b</sup> is located nearby the G-protein binding  
273 interface of PTH2R. In the simulations of the G258D mutant receptor, Asp258<sup>3.51b</sup> disturbs the  
274 hydrophobic interactions involving Leu259<sup>3.52b</sup>, Leu332<sup>5.53b</sup> and Phe372<sup>6.49b</sup> to distort the helical  
275 bundle of TM3, TM5 and TM6 at the intracellular side (Fig. 5A-D). Consequentially, the G protein-  
276 binding interface is disordered and unfavorable to bind to a heterotrimeric G<sub>s</sub> protein (Fig. 5E, F).  
277 While cAMP response was not affected in S158F mutant (Table S6), both S158F and G258D showed  
278 impaired G<sub>q</sub> coupling (Fig. S11). Based on the atomic-level structural information of PTH2R, we were  
279 able to quantitatively interpret the mutational data. This understanding provides valuable information  
280 to develop new therapies for disorders associated with PTH2R.

281

## 282 **Materials and Methods**

283 The data that support the findings of this study are available in this paper and/or in supplementary  
284 information. Atomic coordinates of the TIP39-PTH2R-G<sub>s</sub> complex have been deposited in the Protein  
285 Data Bank (<https://www.rcsb.org/>) under accession code 7F16. The electron microscopy maps have  
286 been deposited in the Electron Microscopy Data Bank (EMDB) under accession number EMD-31405.

287 **Construct.** The human PTH2R (residues 25-442) was cloned into the pFastBac vector (Invitrogen)  
288 with its native signal peptide replaced by haemagglutinin (HA) signal peptide to enhance receptor  
289 expression. LgBiT subunit (Promega) was fused at the C-terminus of PTH2R connected by a 20-amino  
290 acid linker. A TEV protease cleavage site and double maltose-binding protein (2MBP) tag were fused  
291 after LgBiT subunit. A dominant-negative human G<sub>αs</sub> (S54N, G226A, E268A, N271K, K274D,  
292 R280K, T284D and I285T) (31) was generated to stabilize the interaction with the βγ subunits. A 15-  
293 amino acid linker and SmBiT subunit (peptide 86, Promega) were attached to the C-terminus of rat  
294 Gβ1. Human DNG<sub>αs</sub>, rat Gβ1 and bovine Gγ2 were cloned into pFastBac vector, respectively.

295 **TIP39-PTH2R-G<sub>s</sub> complex formation and purification.** After dounce homogenization of High Five  
296 insect cell pellets in lysis buffer (20 mM HEPES, pH 7.4, 100 mM NaCl, 10% (v/v) glycerol  
297 supplemented with EDTA-free protease inhibitor cocktail, Topscience), membrane was collected at  
298 65,000× g for 35 min and homogenized again in lysis buffer. The complex formation was initiated by  
299 addition of 20 μM TIP39 (GL Biochem), 15 μg/mL Nb35, 25 mU/mL apyrase (NEB), 5 mM CaCl<sub>2</sub>, 10  
300 mM MgCl<sub>2</sub>, 1 mM MnCl<sub>2</sub> and 100 μM TCEP for 1.5 h incubation at room temperature (RT). The  
301 membrane was solubilized by 0.5% (w/v) lauryl maltose neopentyl glycol (LMNG; Anatrace) and  
302 0.1% (w/v) cholesterol hemisuccinate (CHS; Anatrace) for 2 h at 4°C. After centrifugation at 65,000×  
303 g for 35 min, the supernatant was separated and incubated with amylose resin (NEB) for 2 h at 4°C.  
304 The resin was collected and packed into a gravity flow column and washed with 5 column volumes of  
305 5 μM TIP39, 0.1% (w/v) LMNG, 0.02% (w/v) CHS, 20 mM HEPES, pH7.4, 100 mM NaCl, 10% (v/v)  
306 glycerol, 5 mM MgCl<sub>2</sub>, 1 mM MnCl<sub>2</sub> and 25 μM TCEP, followed by 20 column volumes of washing  
307 buffer with decreased concentrations of detergents 0.03% (w/v) LMNG, 0.01% (w/v) GDN and  
308 0.008% (w/v) CHS. 2MBP-tag was removed by His-tagged TEV protease (home-made) during  
309 overnight incubation. The complex was concentrated using an Amicon Ultra Centrifugal filter  
310 (MWCO, 100 kDa) and subjected to a Superose 6 Increase 10/300 GL column (GE Healthcare) that  
311 was pre-equilibrated with running buffer containing 20 mM HEPES, pH 7.4, 100 mM NaCl, 2 mM  
312 MgCl<sub>2</sub>, 100 μM TCEP, 5 μM TIP39, 0.00075% (w/v) LMNG, 0.00025% (w/v) GDN and 0.0002%  
313 (w/v) CHS. Eluted fractions containing the TIP39-PTH2R-G<sub>s</sub> complex were pooled and concentrated.  
314 All procedures mentioned above were performed at 4°C.

315 **Cryo-EM data acquisition.** The purified TIP39–PTH2R–Gs complex (3  $\mu$ L at 8.5 mg per mL) was  
316 applied on a glow-discharged holey carbon grid (Quantifoil R1.2/1.3). Vitrification was performed  
317 using a Vitrobot Mark IV (ThermoFisher Scientific) at 100% humidity and 4°C. Cryo-EM imaging  
318 was processed on a Titan Krios (FEI) equipped with a Gatan K3 Summit direct electron detector in the  
319 Center of Cryo-Electron Microscopy, Shanghai Institute of Materia Medica, CAS (China). The  
320 microscope was operated at 300 kV accelerating voltage, at a nominal magnification of 95,694 $\times$  in  
321 counting mode, corresponding to a pixel size of 0.5225 Å. In total, 3614 movies were obtained.

322 **Model building and refinement.** Cryo-EM structure model of the PTH2R–Gs–Nb35 complex was  
323 built using the cryo-EM structure of PTH1R–Gs–Nb35 (PDB code: 6NBF) as initial model. The model  
324 was docked into the EM density map using Chimera (32), followed by iterative manual adjustment and  
325 rebuilding in COOT (33). Real space refinement was performed using Phenix (34). The model  
326 statistics were validated using MolProbity (35). Structural figures were prepared in Chimera and  
327 PyMOL (<https://pymol.org/2/>). The final refinement statistics are provided in Table S1.

328 **cAMP accumulation assay.** The wild-type or mutant PTH2Rs were cloned into pcDNA3.1 vector  
329 (Invitrogen) for functional studies. cAMP signal was detected by LANCE cAMP kit (PerkinElmer)  
330 according to manufacturer's instructions. Briefly, HEK-293T cells were seeded onto 6-well culture  
331 plates and transiently transfected with different PTH2R constructs using Lipofectamine 2000  
332 transfection reagent (Invitrogen). After 24 h, cells were digested with 0.02% (w/v) EDTA and  
333 resuspended by HBSS supplemented with 5 mM HEPES, 0.5 mM IBMX and 0.1% (w/v) BSA, pH 7.4  
334 before seeding onto 384-well microtiter plates (3,000 cells per well). Increased concentrations of  
335 TIP39 or PTH (1-34) (1 pM - 1  $\mu$ M) were used to stimulate transfected cells for 40 min at RT. Eu-  
336 tracer and ULight-anti-cAMP working solutions were added to the microtiter plates following 1 h  
337 incubation at RT. Fluorescence signals were measured at 620 nm and 650 nm by an EnVision  
338 multilabel plate reader (PerkinElmer).

339 **FITC-labelled ligand binding assay.** Competitive binding of TIP39-FITC (GL Biochem) to PTH2R  
340 was assessed as described previously (36). Briefly, 24 h after transfection with PTH2R (25-550) or  
341 PTH2R (25-442)-20AA-LgBiT, HEK-293T cells were harvested using 0.2% (w/v) EDTA. They ( $1 \times$   
342  $10^6$  cells/mL) then mixed with 0.2  $\mu$ M TIP39-FITC on ice in the dark for 1 h. Seven decreasing  
343 concentrations of unlabeled peptide were added and competitively reacted with the cells in binding  
344 buffer (HBSS supplemented with 0.5% (w/v) BSA and 20 mM HEPES, pH 7.4) on ice for 2 h. For  
345 each sample, 30,000 cells were analyzed for mean fluorescence intensity (with excitation and emission  
346 wavelengths of 488 and 518 nm) on a FACScan flow cytometer (ACEA Biosciences), with debris  
347 excluded by forward versus side scatter (FSC vs. SSC) gating.

348 **Molecular dynamics simulation.** All peptide-bound PTH2R complex models were built based on the  
349 TIP39-PTH2R-G<sub>s</sub> complex structure using Modeller (37). The default parameters were employed to  
350 construct the models. The missing backbone and side chains were added. The models with the lowest  
351 root mean square deviations from their template structures were selected. To build a simulation  
352 system, we placed the complex model into a 1-palmitoyl-2-oleoyl-sn-glycero-3-phosphocholine lipid  
353 bilayer. The lipid embedded complex model was solvated in a periodic boundary condition box (95 Å  
354 × 95 Å × 170 Å) filed with TIP3P water molecules and 0.15 M KCl using CHARMM-GUI (38). Each  
355 system was replicated to perform two independent simulations. On the basis of the CHARMM36m all-  
356 atom force field (39-41), molecular dynamics simulations were conducted using GROMACS 5.1.4 (42,  
357 43). Further details are provided in supplementary information.

### 358 **References**

- 359 1. K. Pal, K. Melcher, H. E. Xu, Structure and mechanism for recognition of peptide hormones by  
360 Class B G-protein-coupled receptors. *Acta Pharmacol Sin* **33**, 300-311 (2012).
- 361 2. D. Wootten, L. J. Miller, Structural basis for allosteric modulation of class b g protein-coupled  
362 receptors. *Annu Rev Pharmacol Toxicol* **60**, 89-107 (2020).
- 363 3. H. Juppner *et al.*, A G protein-linked receptor for parathyroid hormone and parathyroid  
364 hormone-related peptide. *Science* **254**, 1024-1026 (1991).
- 365 4. T. B. Usdin, C. Gruber, T. I. Bonner, Identification and functional expression of a receptor  
366 selectively recognizing parathyroid hormone, the PTH2 receptor. *J Biol Chem* **270**, 15455-  
367 15458 (1995).
- 368 5. E. L. Dimitrov, J. Kuo, K. Kohno, T. B. Usdin, Neuropathic and inflammatory pain are  
369 modulated by tuberoinfundibular peptide of 39 residues. *Proc Natl Acad Sci U S A* **110**, 13156-  
370 13161 (2013).
- 371 6. A. Dobolyi, H. Ueda, H. Uchida, M. Palkovits, T. B. Usdin, Anatomical and physiological  
372 evidence for involvement of tuberoinfundibular peptide of 39 residues in nociception. *Proc*  
373 *Natl Acad Sci U S A* **99**, 1651-1656 (2002).
- 374 7. E. Sato *et al.*, Activation of parathyroid hormone 2 receptor induces decorin expression and  
375 promotes wound repair. *J Invest Dermatol* **137**, 1774-1783 (2017).
- 376 8. T. Varga *et al.*, Paralemniscal TIP39 is induced in rat dams and may participate in maternal  
377 functions. *Brain Struct Funct* **217**, 323-335 (2012).
- 378 9. E. Sato *et al.*, The parathyroid hormone second receptor pth2r and its ligand tuberoinfundibular  
379 peptide of 39 residues tip39 regulate intracellular calcium and influence keratinocyte  
380 differentiation. *J Invest Dermatol* **136**, 1449-1459 (2016).
- 381 10. I. Meulenbelt *et al.*, Strong linkage on 2q33.3 to familial early-onset generalized osteoarthritis  
382 and a consideration of two positional candidate genes. *Eur J Hum Genet* **14**, 1280-1287 (2006).
- 383 11. D. Tiosano *et al.*, Mutations in PIK3C2A cause syndromic short stature, skeletal abnormalities,  
384 and cataracts associated with ciliary dysfunction. *PLoS Genet* **15**, e1008088 (2019).

- 385 12. L. Cuttler, Safety and efficacy of growth hormone treatment for idiopathic short stature. *J Clin*  
386 *Endocrinol Metab* **90**, 5502-5504 (2005).
- 387 13. T. B. Usdin, S. R. Hoare, T. Wang, E. Mezey, J. A. Kowalak, TIP39: a new neuropeptide and  
388 PTH2-receptor agonist from hypothalamus. *Nat Neurosci* **2**, 941-943 (1999).
- 389 14. T. J. Gardella, J. P. Vilaradaga, International union of basic and clinical pharmacology. xciii. the  
390 parathyroid hormone receptors--family b g protein-coupled receptors. *Pharmacol Rev* **67**, 310-  
391 337 (2015).
- 392 15. B. Z. Leder *et al.*, Effects of abaloparatide, a human parathyroid hormone-related peptide  
393 analog, on bone mineral density in postmenopausal women with osteoporosis. *J Clin*  
394 *Endocrinol Metab* **100**, 697-706 (2015).
- 395 16. T. B. Usdin, A. Dobolyi, H. Ueda, M. Palkovits, Emerging functions for tuberoinfundibular  
396 peptide of 39 residues. *Trends Endocrinol Metab* **14**, 14-19 (2003).
- 397 17. S. R. J. Hoare, T. B. Usdin, Tuberoinfundibular peptide (7-39) [TIP(7-39)], a novel, selective,  
398 high-affinity antagonist for the parathyroid hormone-1 receptor with no detectable agonist  
399 activity. *J Pharmacol Exp Ther* **295**, 761-770 (2000).
- 400 18. L. H. Zhao *et al.*, Structure and dynamics of the active human parathyroid hormone receptor-1.  
401 *Science* **364**, 148-153 (2019).
- 402 19. D. Wootten, J. Simms, L. J. Miller, A. Christopoulos, P. M. Sexton, Polar transmembrane  
403 interactions drive formation of ligand-specific and signal pathway-biased family B G protein-  
404 coupled receptor conformations. *Proc Natl Acad Sci U S A* **110**, 5211-5216 (2013).
- 405 20. X. Zhang *et al.*, Differential GLP-1R binding and activation by peptide and non-peptide  
406 agonists. *Mol Cell* **80**, 485-500 e487 (2020).
- 407 21. A. Qiao *et al.*, Structural basis of Gs and Gi recognition by the human glucagon receptor.  
408 *Science* **367**, 1346-1352 (2020).
- 409 22. L. H. Zhao *et al.*, Differential requirement of the extracellular domain in activation of class B G  
410 protein-coupled receptors. *J Biol Chem* **291**, 15119-15130 (2016).
- 411 23. Y. L. Liang *et al.*, Phase-plate cryo-EM structure of a class B GPCR-G-protein complex.  
412 *Nature* **546**, 118-123 (2017).
- 413 24. Y. Zhang *et al.*, Cryo-EM structure of the activated GLP-1 receptor in complex with a G  
414 protein. *Nature* **546**, 248-253 (2017).
- 415 25. Y. L. Liang *et al.*, Phase-plate cryo-EM structure of a biased agonist-bound human GLP-1  
416 receptor-Gs complex. *Nature* **555**, 121-+ (2018).
- 417 26. S. Ma *et al.*, Molecular basis for hormone recognition and activation of corticotropin-releasing  
418 factor receptors. *Mol Cell* **77**, 669-680 e664 (2020).
- 419 27. T. J. Gardella, G. S. Jensen, M. Luck, T. B. Usdin, H. Juppner, Converting parathyroid  
420 hormone-related peptide (PTHrP) into a potent PTH-2 receptor agonist. *J Bone Miner Res* **11**,  
421 77-77 (1996).
- 422 28. R. W. Cheloha, T. Watanabe, T. Dean, S. H. Gellman, T. J. Gardella, Backbone Modification of  
423 a parathyroid hormone receptor-1 antagonist/inverse agonist. *Acs Chemical Biology* **11**, 2752-



- 424 2762 (2016).
- 425 29. S. H. Doppelt *et al.*, Inhibition of the *in vivo* parathyroid hormone-mediated calcemic response  
426 in rats by a synthetic hormone antagonist. *P Natl Acad Sci USA* **83**, 7557-7560 (1986).
- 427 30. N. Horiuchi, M. F. Holick, J. T. Potts, M. Rosenblatt, A Parathyroid-hormone inhibitor *in vivo* -  
428 design and biological evaluation of a hormone analog. *Science* **220**, 1053-1055 (1983).
- 429 31. Y. L. Liang *et al.*, Dominant negative G proteins enhance formation and purification of agonist-  
430 GPCR-G protein complexes for structure determination. *ACS Pharmacol Transl Sci* **1**, 12-20  
431 (2018).
- 432 32. E. F. Pettersen *et al.*, UCSF Chimera--a visualization system for exploratory research and  
433 analysis. *J Comput Chem* **25**, 1605-1612 (2004).
- 434 33. P. Emsley, K. Cowtan, Coot: model-building tools for molecular graphics. *Acta Crystallogr D*  
435 *Biol Crystallogr* **60**, 2126-2132 (2004).
- 436 34. P. D. Adams *et al.*, PHENIX: a comprehensive Python-based system for macromolecular  
437 structure solution. *Acta Crystallogr D Biol Crystallogr* **66**, 213-221 (2010).
- 438 35. V. B. Chen *et al.*, MolProbity: all-atom structure validation for macromolecular crystallography.  
439 *Acta Crystallogr D Biol Crystallogr* **66**, 12-21 (2010).
- 440 36. H. Fan *et al.*, The non-peptide GLP-1 receptor agonist WB4-24 blocks inflammatory  
441 nociception by stimulating beta-endorphin release from spinal microglia. *Br J Pharmacol* **172**,  
442 64-79 (2015).
- 443 37. A. Sali, T. L. Blundell, Comparative protein modelling by satisfaction of spatial restraints. *J*  
444 *Mol Biol* **234**, 779-815 (1993).
- 445 38. E. L. Wu *et al.*, CHARMM-GUI membrane builder toward realistic biological membrane  
446 simulations. *J Comput Chem* **35**, 1997-2004 (2014).
- 447 39. O. Guvench *et al.*, CHARMM additive all-atom force field for carbohydrate derivatives and its  
448 utility in polysaccharide and carbohydrate-protein modeling. *J Chem Theory Comput* **7**, 3162-  
449 3180 (2011).
- 450 40. J. Huang *et al.*, CHARMM36m: an improved force field for folded and intrinsically disordered  
451 proteins. *Nat Methods* **14**, 71-73 (2017).
- 452 41. A. D. MacKerell *et al.*, All-atom empirical potential for molecular modeling and dynamics  
453 studies of proteins. *J Phys Chem B* **102**, 3586-3616 (1998).
- 454 42. B. Hess, C. Kutzner, D. van der Spoel, E. Lindahl, GROMACS 4: algorithms for highly  
455 efficient, load-balanced, and scalable molecular simulation. *J Chem Theory Comput* **4**, 435-447  
456 (2008).
- 457 43. D. Van Der Spoel *et al.*, GROMACS: fast, flexible, and free. *J Comput Chem* **26**, 1701-1718  
458 (2005).

459  
460 **Acknowledgments**

461 We thank Chenyao Li and Wen Sun for technical assistance. This work was partially supported by  
462 National Natural Science Foundation of China 81872915 and 82073904 (M.-W.W.), 32071203  
463 (L.H.Z), 81773792 (D.Y.), 81973373 (D.Y.) and 21704064 (Q.Z.); National Science and Technology  
464 Major Project of China – Key New Drug Creation and Manufacturing Program 2018ZX09735–001  
465 (M.-W.W.), 2018ZX09711002–002–005 (D.Y.) and 2018ZX09711002–002–003 (X.C.); the National  
466 Key Basic Research Program of China 2018YFA0507000 (M.-W.W.); Ministry of Science and  
467 Technology of China 2018YFA0507002 (H.E.X.); Shanghai Municipal Science and Technology  
468 Major Project 2019SHZDZX02 (H.E.X.); the Strategic Priority Research Program of Chinese  
469 Academy of Sciences XDB37030103 (H.E.X.); Novo Nordisk-CAS Research Fund grant NNCAS-  
470 2017–1-CC (D.Y.); Shanghai Science and Technology Development Fund 18ZR1447800 (L.H.Z.),  
471 The Young Innovator Association of CAS 2018325 (L.H.Z.) and SA-SIBS Scholarship Program  
472 (L.H.Z. and D.Y.). The Youth Innovation Promotion Association of CAS 2018319 (X.C). The cryo-  
473 EM data were collected at Cryo-Electron Microscopy Research Center, Shanghai Institute of Materia  
474 Medica.

475 **Author contributions:** X.W., L.H.Z. and C.Y.Y. designed the expression constructs, purified the  
476 receptor complexes, prepared cryo-EM grids and collected data towards the structure; Y.Z.W. and J.C.  
477 developed ligand binding assay; X.Y.Z. and T.X. made map calculation; X.C., L.H.Z. and Q.T.Z.  
478 performed structural analysis and prepared figures; X.C. and H.L.J. conducted MD simulations;  
479 A.T.D., Y.Z.W. and X.W. conducted functional experiments; D.Y. supervised mutagenesis and  
480 signaling studies; H.E.X. and M.-W.W. initiated the project and supervised the project. X.W., X.C.,  
481 L.H.Z. and M.-W.W. wrote the manuscript with inputs from all co-authors.

482 **Competing interests:** Authors declare that they have no competing interests.

483

484 **Figures**

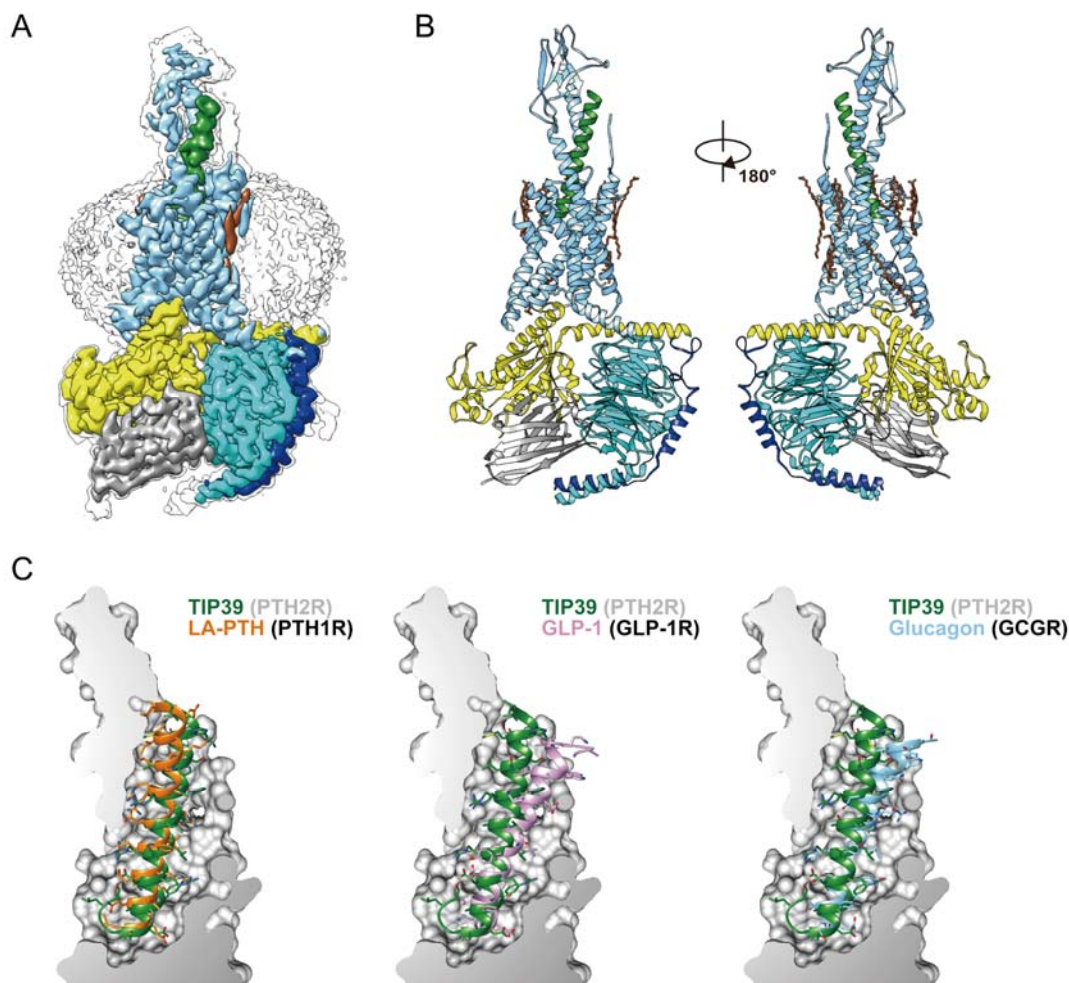

485

486 **Figure 1. The overall cryo-EM structure of the TIP39–PTH2R-G<sub>s</sub> complex.** (A) Cut-through view  
487 of the cryo-EM density map that illustrates the TIP39-PTH2R-G<sub>s</sub> complex and the disc-shaped  
488 micelle. The unsharpened cryo-EM density map at the 0.06 threshold shown as gray surface indicates a  
489 micelle diameter of 11 nm. The colored cryo-EM density map is shown at 0.12 threshold. (B) Model of  
490 the complex as a cartoon, with TIP39 as helix in green. The receptor is shown in blue, G<sub>αs</sub> in yellow,  
491 G<sub>β</sub> subunit in cyan, G<sub>γ</sub> subunit in navy blue and Nb35 in gray. (C) The binding pocket of PTH2R  
492 accommodates peptide ligands of class B1 receptors. TIP39 is compared with LA-PTH (left), GLP-1  
493 (middle) and Glucagon (right), respectively.

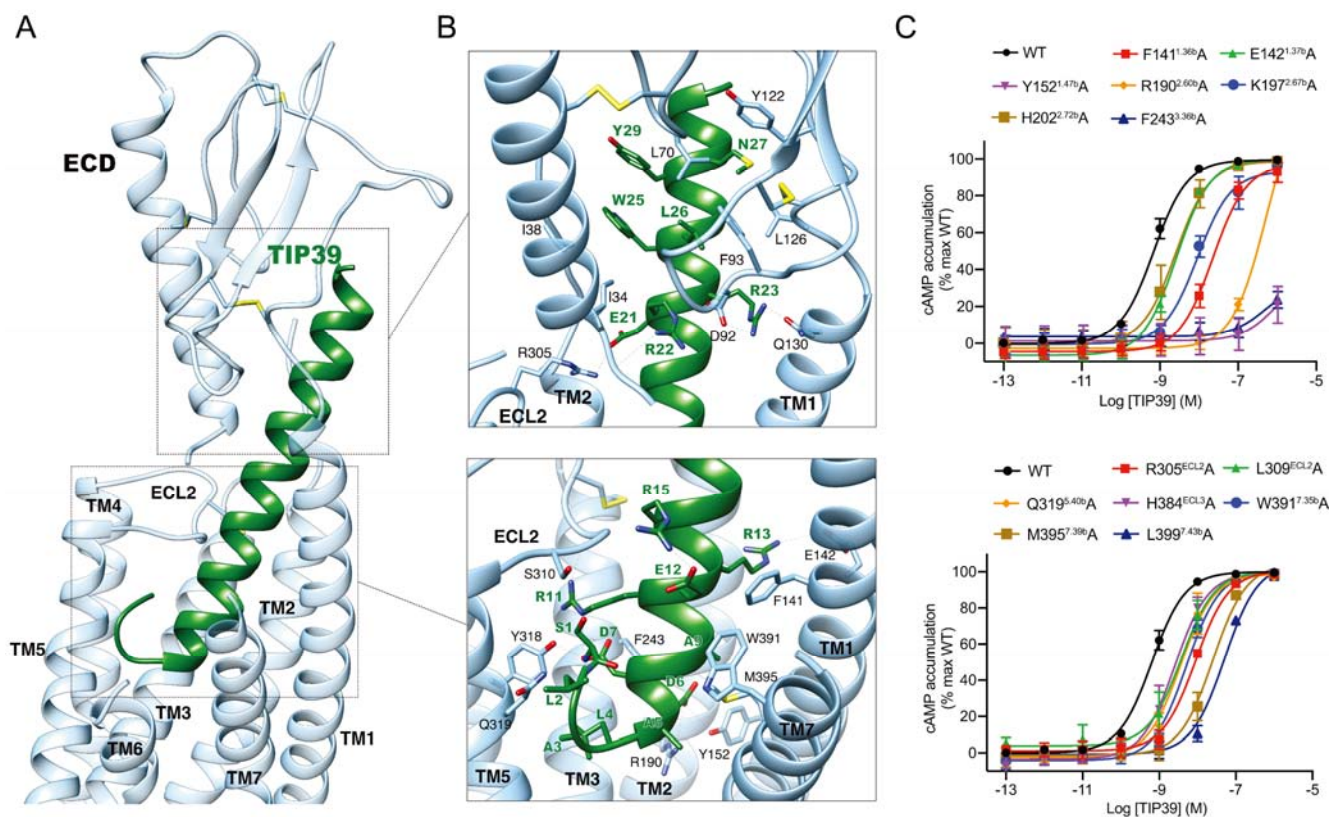

494

495 **Figure 2. Molecular recognition and ligand specificity of PTH2R.** (A) Overall contacts between  
496 PTH2R (blue) and TIP39 (green). (B) Detail contacts between PTH2R (blue) and TIP39 (green)  
497 in the ECD or the TMD. Key residues are shown as sticks. (C) Effects of receptor mutations on TIP39-  
498 induced cAMP accumulation. Data shown are means  $\pm$  S.E.M. of at least three independent  
499 experiments.

500

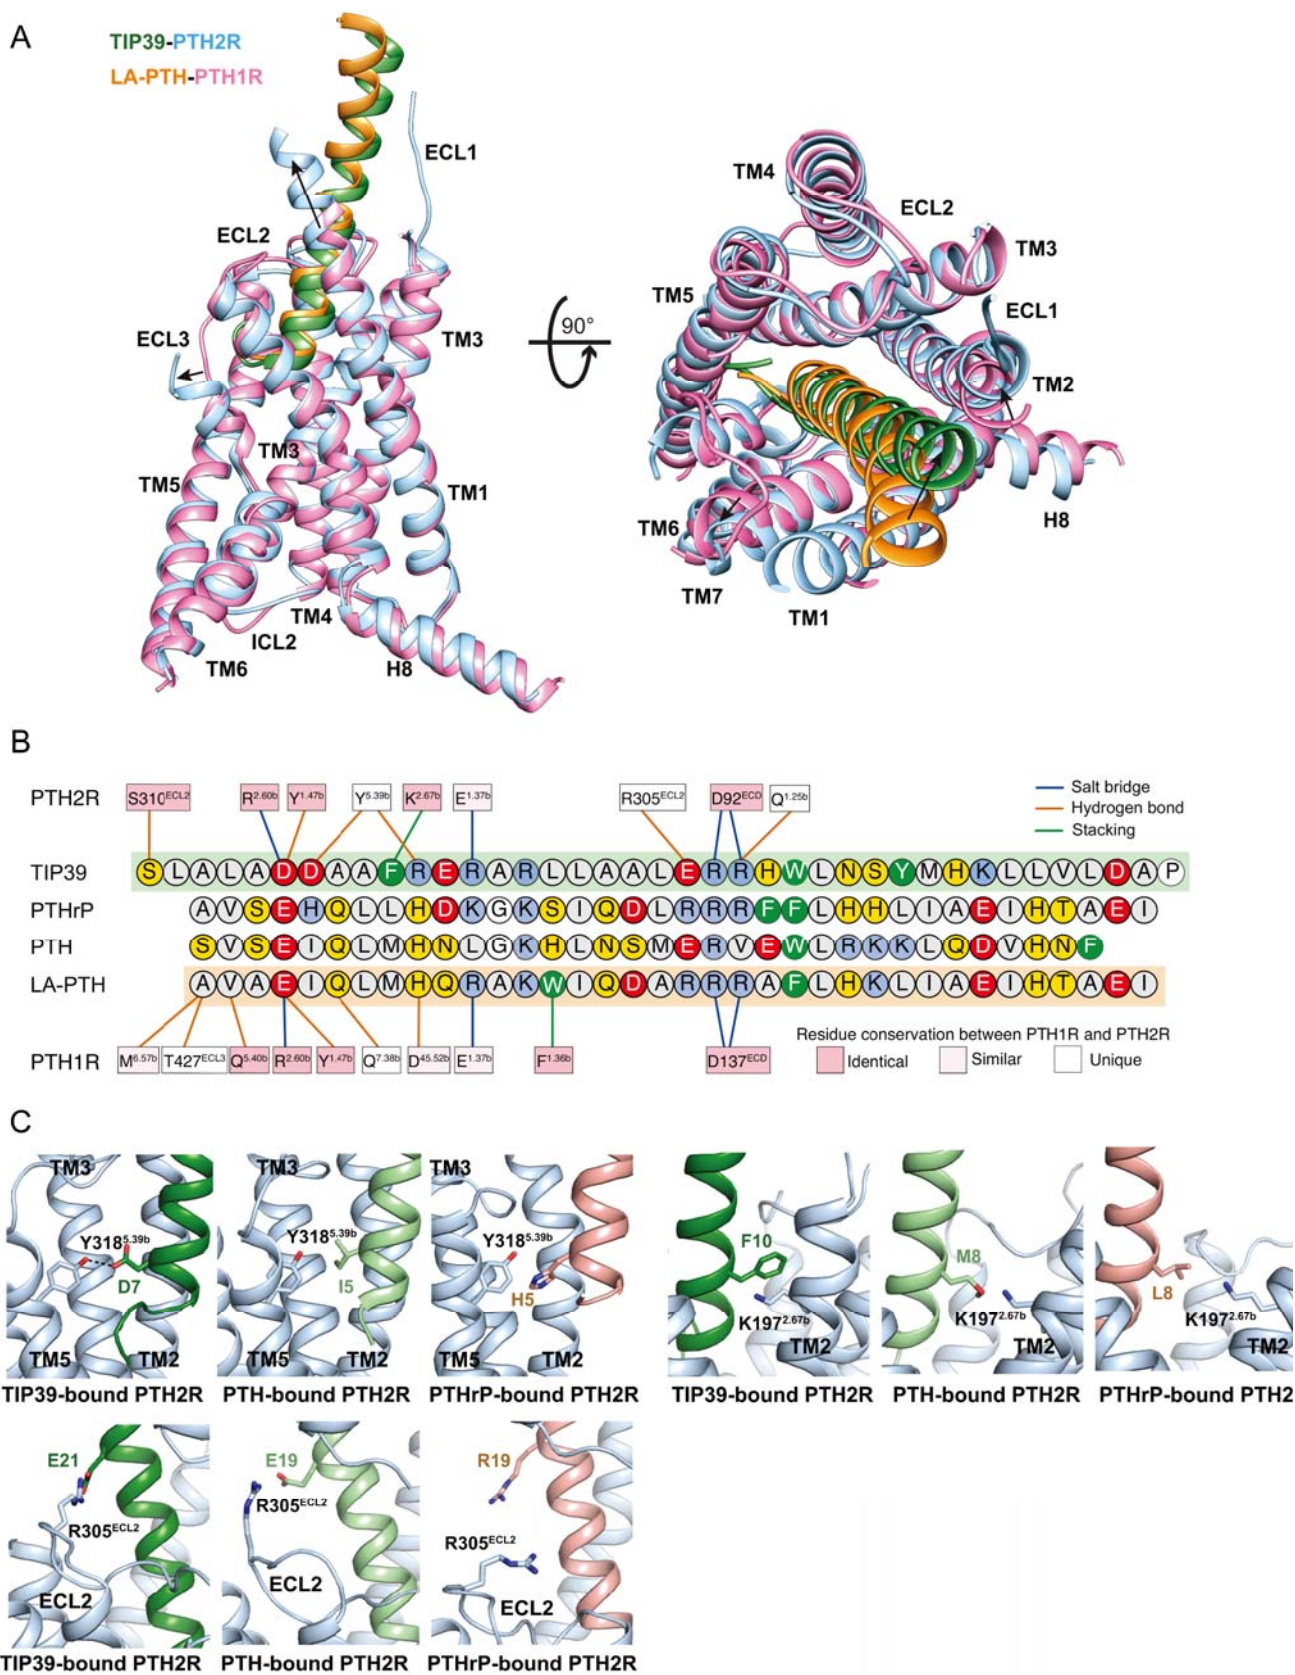

502 **Figure 3. Ligand specificity between PTH1R and PTH2R.** (A) Structural comparison of TIP39-  
503 PTH2R-G<sub>s</sub> and LA-PTH-PTH1R-G<sub>s</sub> complexes. Receptor ECD and G protein are omitted for clarity.  
504 (B) Schematic diagram of interactions between peptide and receptor. Conserved residues in PTH1R  
505 and PTH2R are highlighted in pink, while those similar are shown in light pink. Amino acid residues  
506 of peptides are colored: red, negatively charged; blue, positively charged; yellow, hydrophilic; green,  
507 aromatic; gray, hydrophobic. Hydrophobic contacts are omitted for clarity. (C) Representative  
508 snapshots from MD simulations showing the key residues that determine the ligand specificity of  
509 PTH2R (blue). TIP39, PTH and PTHrP are depicted in green, light green and pink, respectively.  
510

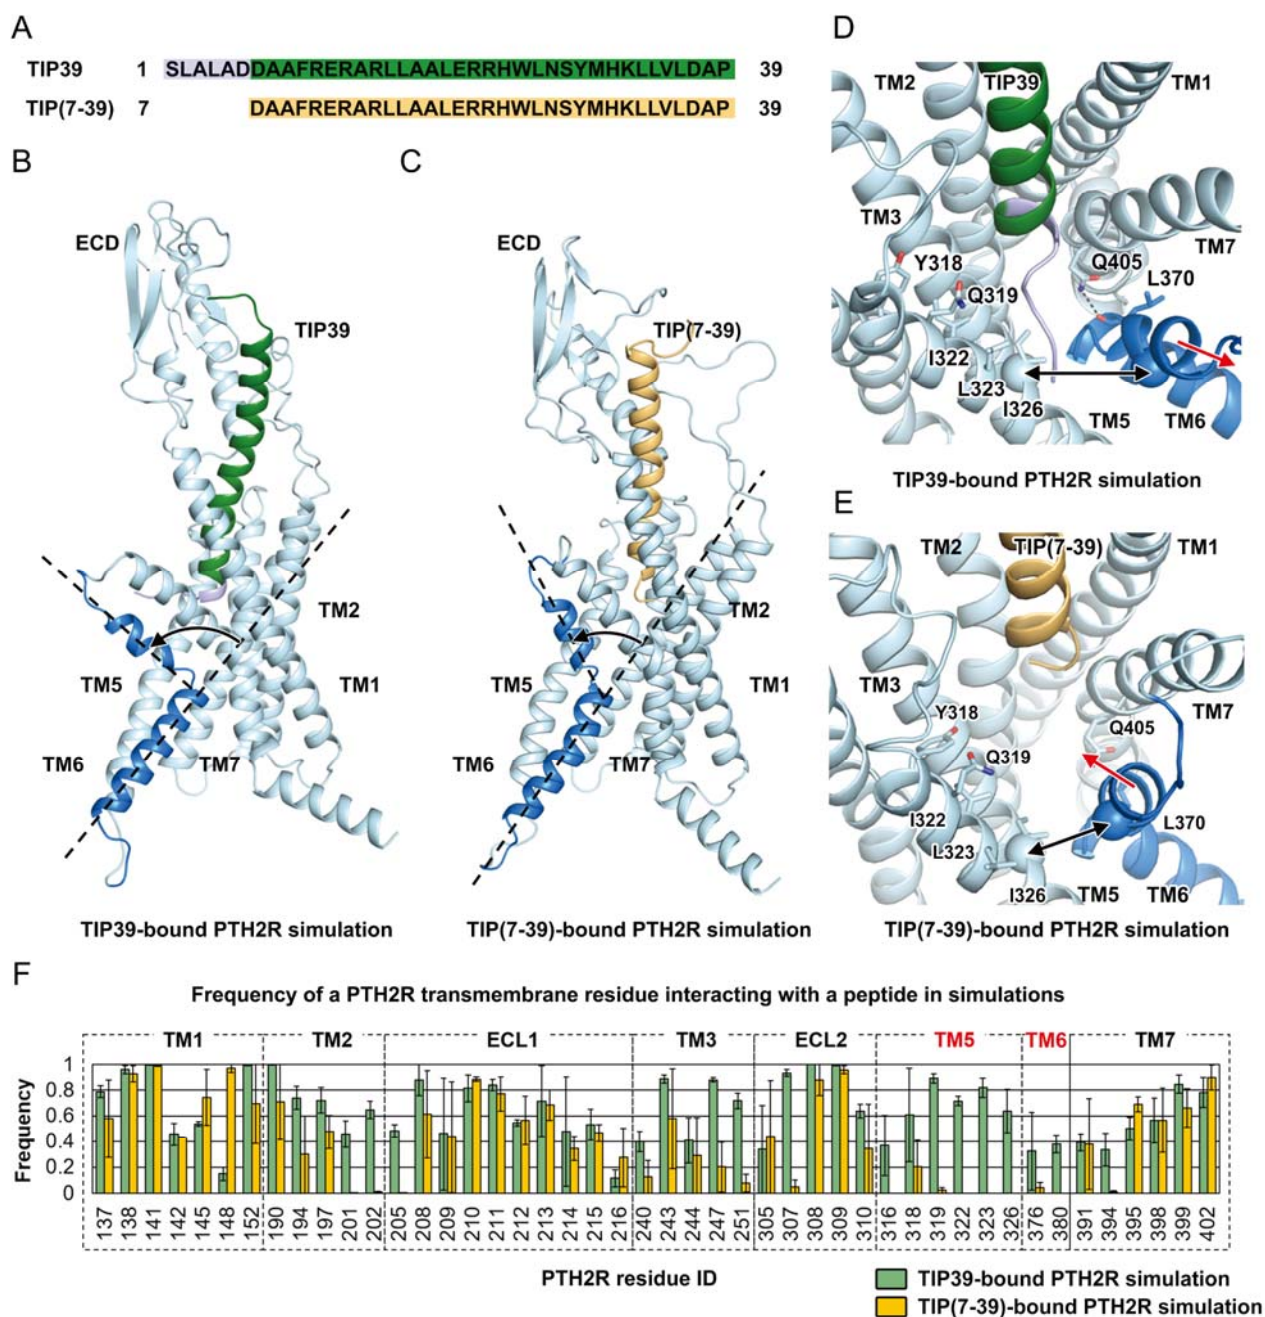

511

512 **Figure 4. Molecular mechanism of the TIP(7-39) antagonism at PTH2R.** (A) Sequence alignment  
 513 between TIP39 and TIP(7-39). (B) A representative snapshot from the TIP39-bound PTH2R  
 514 simulation system showing a TIP39-induced conformational change of the TM6 helix. (C) A  
 515 representative snapshot from the TIP(7-39)-bound PTH2R simulation system showing a TIP(7-39)-  
 516 induced conformational change of the TM6 helix. (D) A representative snapshot from the TIP39-  
 517 bound PTH2R simulation system showing the N terminus of TIP39 insertion between TM5 and TM6  
 518 helices. Key residues are shown as sticks. Hydrogen bonds are show as dash lines. The C $\alpha$  atoms of

519 residues Ile326<sup>5.47b</sup> and Ile377<sup>6.54b</sup> are shown as spheres. **(E)** A representative snapshot from the TIP(7-  
520 39)-bound PTH2R simulation system showing a conformational change of the TM6 helix. **(F)**  
521 Frequency of a PTH2R residue interacting with TIP39 (green) or TIP(7-39) (yellow) in simulations.  
522 The frequency value indicates the stability of a particular residue-peptide interaction. A large  
523 interacting frequency indicates a stable interaction.  
524



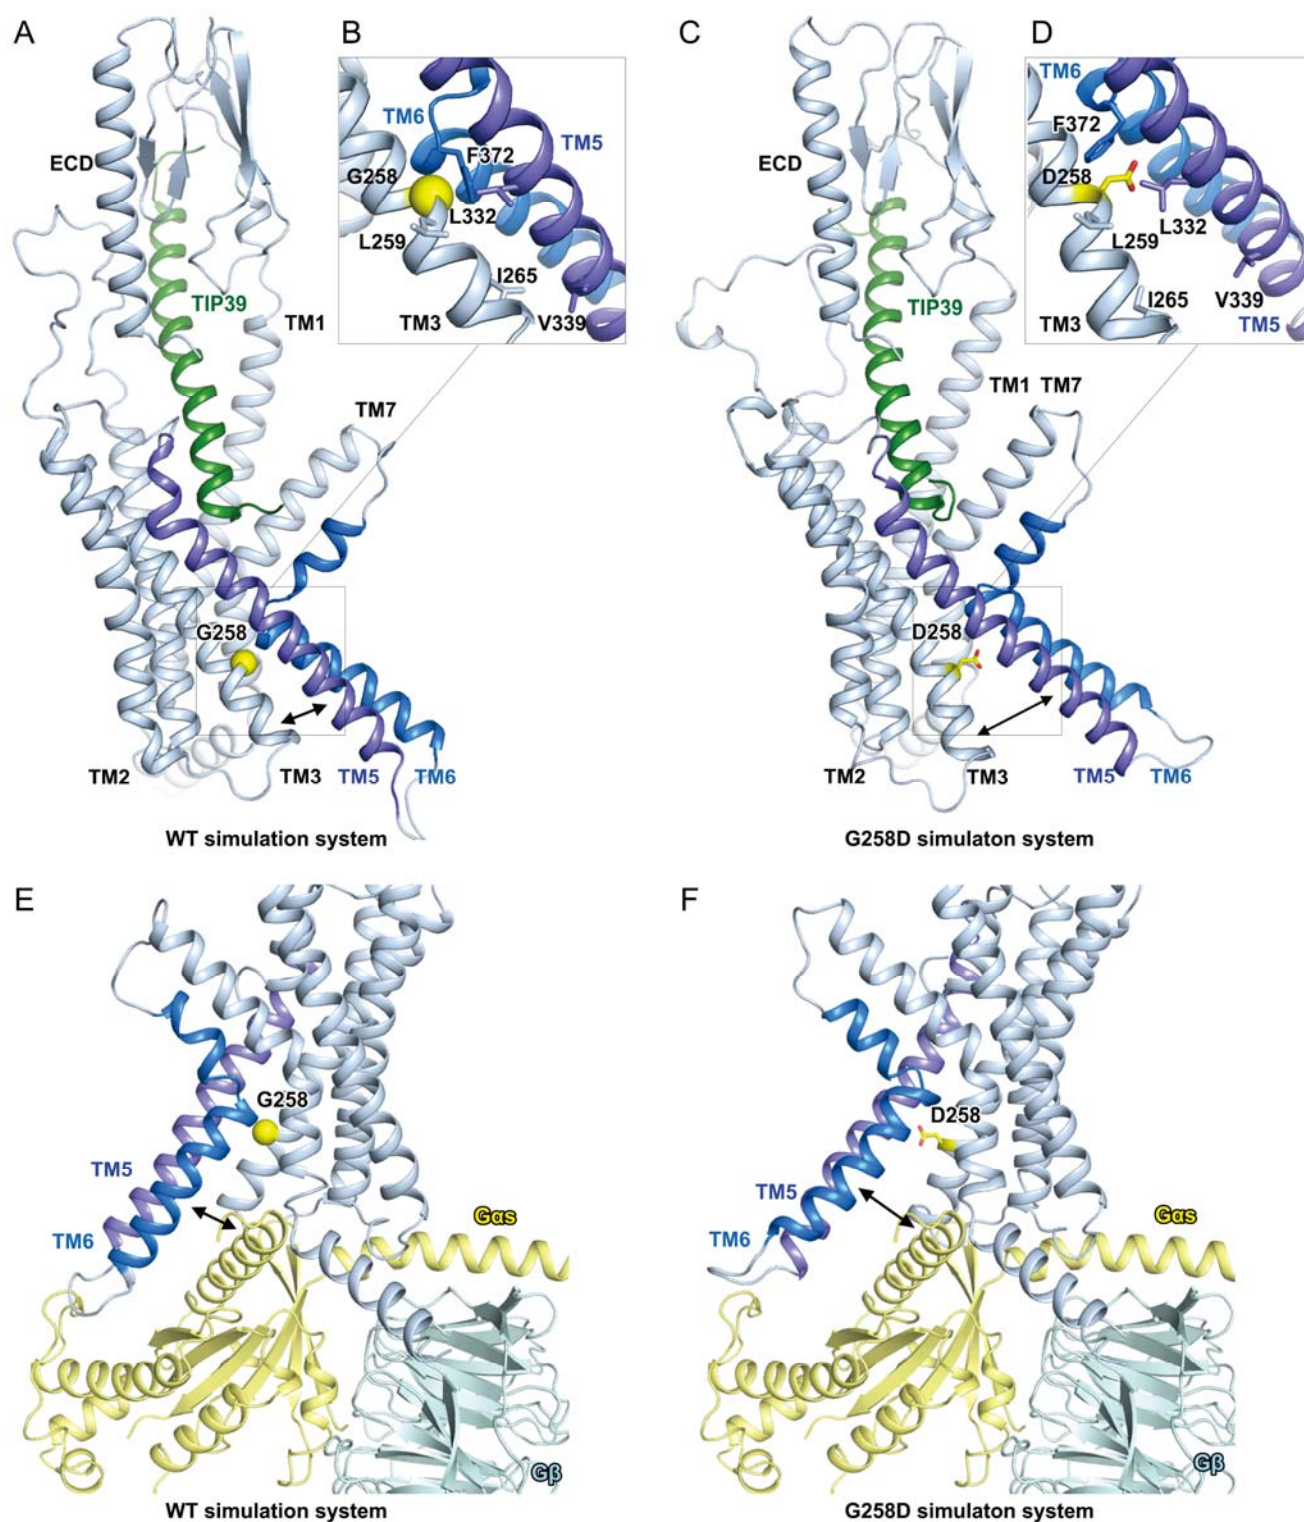

525  
526 **Figure 5. G258D mutation disrupts the G protein-binding interface of PTH2R in MD**  
527 **simulations.** (A) A representative snapshot from the wild-type (WT) PTH2R simulations. (B)  
528 Key interactions stabilizing the helical bundle of TM3, TM5 and TM6 in the WT PTH2R simulations. Key  
529 residues are shown as sticks. Gly258<sup>3.51b</sup> is shown as a yellow sphere. (C) A representative snapshot

530 from the G258D PTH2R simulations. **(D)** Asp258<sup>3.51b</sup> disrupts the hydrophobic interactions among  
531 helices TM3, TM5 and TM6 in the G258D PTH2R simulations. Key residues are shown as sticks.  
532 Asp258<sup>3.51b</sup> is highlighted in yellow. **(E)** A representative conformation of the G protein-binding  
533 interface of the WT PTH2R in simulations. The cryo-EM structure of TIP39-PTH2R-G<sub>s</sub> complex was  
534 aligned to the simulation resulting conformation to show the position of G protein with respect to the  
535 receptor. **(F)** A representative conformation of the G protein-binding interface of the G258D PTH2R  
536 in simulations.
